# Supplementary material for: A visualized sensor based on layered double hydroxides with peroxidase-like activity for sensitive acetylcholinesterase assay
Source: Royal Society of Chemistry journal article supplement (doi:10.1039/d3ay00776f), 2023-01-01
Supplement: d3ay00776f1.pdf [file d3ay00776f1.pdf]

## Supporting Information

### Visualized sensor based on layered double hydroxides with peroxidase-like activity for sensitive acetylcholinesterase assay

Hao Cheng<sup>a,b</sup>, Yuying Wang<sup>a,b</sup>, Yue Wang<sup>a</sup>, Lei Ge<sup>a</sup>, Xiaojuan Liu<sup>\*a</sup> and Feng Li <sup>\*a</sup>

<sup>a</sup>College of Chemistry and Pharmaceutical Sciences, Qingdao Agricultural  
University, Qingdao 266109, P. R. China.

<sup>b</sup>College of plant health & medicine, Qingdao Agricultural University, Qingdao  
266109, P. R. China.

\* Corresponding author. Tel/Fax: 86-532-58957855

E-mail: [xjliu@qau.edu.cn](mailto:xjliu@qau.edu.cn) (Xiaojuan Liu); [lifeng@qau.edu.cn](mailto:lifeng@qau.edu.cn) (Feng Li);

## Contents

|                                             |            |
|---------------------------------------------|------------|
| <b>Experimental section.....</b>            | <b>S3</b>  |
| Chemicals and materials.....                | S3         |
| Instruments .....                           | S3         |
| Peroxidase-like activity of Ni/Co LDHs..... | S4         |
| Kinetic study of Ni/Co LDHs nanozyme.....   | S4         |
| Fetal bovine serum sample assay.....        | S4         |
| <b>Supporting tables.....</b>               | <b>S6</b>  |
| Table S1.....                               | S6         |
| Table S2.....                               | S7         |
| Table S3.....                               | S8         |
| <b>Supporting figures.....</b>              | <b>S9</b>  |
| Fig. S1.....                                | S9         |
| Fig. S2.....                                | S10        |
| Fig. S3.....                                | S11        |
| Fig. S4.....                                | S12        |
| Fig. S5.....                                | S13        |
| Fig. S6.....                                | S14        |
| Fig. S7.....                                | S15        |
| Fig. S8.....                                | S16        |
| Fig. S9.....                                | S17        |
| Fig. S10.....                               | S18        |
| Fig. S11.....                               | S19        |
| Fig. S12.....                               | S20        |
| Fig. S13.....                               | S21        |
| <b>References .....</b>                     | <b>S22</b> |

## Experimental section

### *Chemicals and materials*

Cobalt chloride hexahydrate ( $\text{CoCl}_2 \cdot 6\text{H}_2\text{O}$ ), nickel chloride hexahydrate ( $\text{NiCl}_2 \cdot 6\text{H}_2\text{O}$ ), ammonia solution ( $\text{NH}_3 \cdot 6\text{H}_2\text{O}$ ), Hepes ( $\text{C}_8\text{H}_{18}\text{N}_2\text{O}_4\text{S}$ ), o-Phenylenediamine (OPD), 3,3',5,5'-Tetramethylbenzidine (TMB), 2,2'-Azinobis-(3-ethylbenzthiazoline-6-sulphonate) (ABTS),  $\text{H}_2\text{O}_2$  (30%), and NaOH with analytical grade were obtained from Sinopharm Chemical Reagent Co., Ltd. (Shanghai, China). Bovine serum albumin (BSA), glucose oxidase (GOX), lambda exonuclease ( $\lambda$ -Exo), thrombin, nicking endonuclease (Nt.BbvCI) were purchased from New England Biolabs Inc. (Beijing, China). Acetylcholinesterase (AChE) from electric eel were obtained from Aladdin Industrial Corporation (Shanghai, China). Ultrapure water (resistivity  $\geq 18.2 \text{ M}\Omega \cdot \text{cm}$  at  $25 \text{ }^\circ\text{C}$ ) used in the experiments was obtained from a Milli-Q water purification system (Millipore Corp., Bedford, MA, USA).

### *Instruments*

All the UV-vis spectra were gotten from an UV-1800 spectrophotometer (Shimadzu, Japan). Scanning electron microscopy (SEM) images and energy dispersive spectroscopy (EDS) were performed on a JSM-IT500 field-emission scanning electron microscopy equipped with an EDS detector (Hitachi, Japan). Transmission electron microscopy (TEM) was measured using the HT7700 microscope (Hitachi, Japan). X-ray diffraction (XRD) patterns were taken on a Bruker D8 Advance X-ray diffractometer (Bruker, Germany). Zeta potential was tested on a Zetasizer Nano ZEN3690 (Malvern Instruments Ltd., Malvern, UK), in which the pH of the Ni/Co LDHs ( $0.2 \text{ mg mL}^{-1}$ , 1 mL) and the mixture of Ni/Co LDHs ( $0.2 \text{ mg mL}^{-1}$ , 1 mL)/AChE ( $0.2 \text{ mg mL}^{-1}$ , 1 mL) were adjusted to 7, 8, 9, and 10 by adding NaOH, respectively. X-ray photoelectron

spectroscopy (XPS) spectra were recorded on Thermo Scientific ESCALAB Xi+ spectrometer.

#### ***Peroxidase-like activity of Ni/Co LDHs***

The peroxidase-like activity of Ni/Co LDHs was measured by monitoring the absorbance of oxOPD at 420 nm as detailed below. First, Ni/Co LDHs (100  $\mu\text{L}$ , 1.0  $\text{mg mL}^{-1}$ ),  $\text{H}_2\text{O}_2$  (100  $\mu\text{L}$ , 5 mM), and Hepes (200  $\mu\text{L}$ , 10 mM, pH = 9.0) was added to 2 mL centrifuge tube, followed by the addition of OPD (100  $\mu\text{L}$ , 5 mM). The resulted solution was allowed to react at 37  $^\circ\text{C}$  for 10 min in the dark. Finally, the absorbance of the solution at 420 nm was detected by UV-1800 spectrophotometer. Similarly, the peroxidase-like activity of Ni/Co LDHs was also measured by using TMB and ABTS as the chromogenic agents with similar procedures like OPD.

#### ***Kinetic study of Ni/Co LDHs nanozyme***

Using  $\text{H}_2\text{O}_2$  and OPD as the substrates, the kinetics was investigated by monitoring the absorbance of the system at 420 nm. When OPD was used as the substrate, OPD with different concentrations were added into the Hepes buffer solution with 1  $\text{mg mL}^{-1}$  Ni/Co LDHs and 5 mM  $\text{H}_2\text{O}_2$ . Similarly, when  $\text{H}_2\text{O}_2$  was used as the substrate, the concentration of OPD was fixed to be 5 mM. Then, the absorbance at 420 nm was recorded after incubating at 37  $^\circ\text{C}$  for 10 min. The Michaelis–Menten constant was calculated using a Lineweaver–Burk plot:

$$1/v = K_m/V_{\max}(1/[S] + 1/K_m)$$

where  $v$  is the initial velocity,  $V_{\max}$  represents the maximal reaction velocity,  $[S]$  is the substrate concentration,  $K_m$  is Michaelis–Menten constant, which is an indicator of enzyme affinity for its substrate. The smaller the value of  $K_m$ , the stronger the affinity between the enzyme and the substrate.

#### ***Fetal bovine serum sample assay***

For fetal bovine serum samples detection, aliquots of AChE stock solution were dissolved in 10% bovine serum according to the standard addition method. The final concentrations of AChE were 0, 220, 1100, and 4400  $\mu\text{U mL}^{-1}$  in the spiked serum samples. The absorbance of the proposed sensor towards these serum samples were recorded and the recoveries were calculated.

## Supporting tables

**Table S1.** Comparison of  $K_m$  of different nanozymes.

| Catalyst           | $K_m$ (mM) |          | References |
|--------------------|------------|----------|------------|
|                    | OPD        | $H_2O_2$ |            |
| HRP                | 0.59       | 0.34     | S1         |
| $MnO_2$            | 0.31       | 0.12     | S1         |
| Ag/Pt NPs          | 0.129      | 76.05    | S2         |
| $Au_1Ag_4Pd_1$     | 10.61      | 0.52     | S3         |
| GOx- $Fe_3O_4@SHS$ | 12.1       | -        | S4         |
| Cu-CDs             | 0.588      | -        | S5         |
| Ni/Co LDHs         | 0.213      | 0.327    | This work  |

**Table S2.** Comparison of the analytical performance for the detection of AChE by the as-proposed method and those reported in literature.

| Strategy                                                                               | Method               | Linear range ( $\mu\text{U mL}^{-1}$ ) | LOD ( $\mu\text{U mL}^{-1}$ ) | Ref.      |
|----------------------------------------------------------------------------------------|----------------------|----------------------------------------|-------------------------------|-----------|
| ICT-ESIPT-based fluorescence sensor                                                    | Fluorescence         | ---                                    | $2 \times 10^5$               | S6        |
| Fluorescence assay based on glutathione-capped gold nanoclusters                       | Fluorescence         | $30-3 \times 10^4$                     | 30                            | S7        |
| A ratiometric fluorescence probe based on graphene quantum dots and o-phenylenediamine | Fluorescence         | 2000-4500                              | 90                            | S8        |
| $\text{Ag}^+$ @CTAB-AuNPs system-based colorimetric detection                          | Colorimetric         | $75-2.5 \times 10^4$                   | 75                            | S9        |
| Au-decorated N-rich carbon dots as peroxidase mimics                                   | Colorimetric         | 100-5000                               | 107                           | S10       |
| Acetylcholine-based colorimetric detection                                             | Colorimetric         | 2000- $1.4 \times 10^4$                | 500                           | S11       |
| Cobalt oxyhydroxide nanoflakes-based sensitive colorimetric sensor                     | Colorimetric         | 100-5000                               | 33                            | S12       |
| A pendant droplet-based sensor                                                         | Pendant droplet      | $100-1 \times 10^6$                    | 170                           | S13       |
| Photoelectrochemical sensor based on CdS quantum dots                                  | Photoelectrochemical | 10-1000                                | 10                            | S14       |
| Highly selective SERS detection based on catalytic reaction                            | SERS                 | $2 \times 10^4$ - $4.8 \times 10^6$    | $2 \times 10^4$               | S15       |
| Colorimetric sensor based on peroxidase-mimicking Ni/Co LDHs nanozyme                  | Colorimetric         | $22-2.2 \times 10^5$                   | 6.6                           | This work |

**Table S3.** Recovery data for blank extraction samples of fetal bovine serum (without add AChE) spiked with different concentrations of AChE (n=5).

| Sample number | AChE added<br>( $\mu\text{U mL}^{-1}$ ) | AChE detected<br>( $\mu\text{U mL}^{-1}$ ) | Recovery (%) | RSD |
|---------------|-----------------------------------------|--------------------------------------------|--------------|-----|
| 1             | 0                                       | 0                                          | ---          | --- |
| 2             | 220                                     | 230                                        | 105          | 2.9 |
| 3             | 1100                                    | 1190                                       | 108          | 3.0 |
| 4             | 4400                                    | 4360                                       | 99           | 1.5 |



## Supporting figures

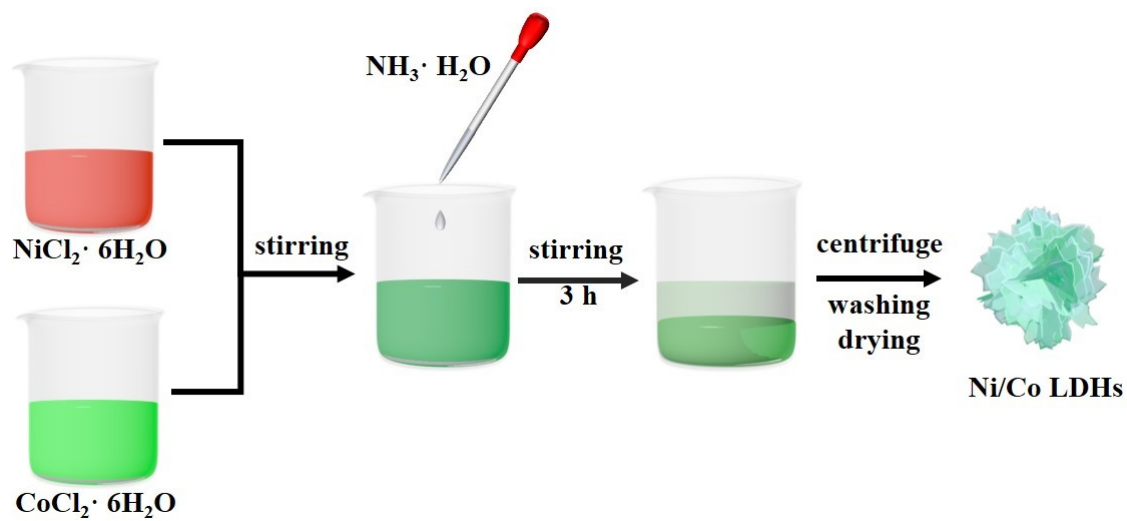

**Fig. S1.** Synthesis schematic of the preparation process of Ni/Co LDHs.

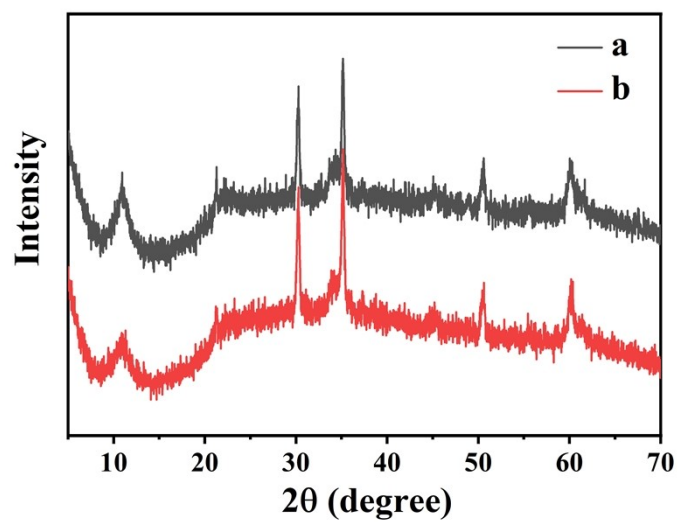

**Fig. S2.** XRD patterns of Ni/Co LDHs before (a) and after (b) adding AChE.

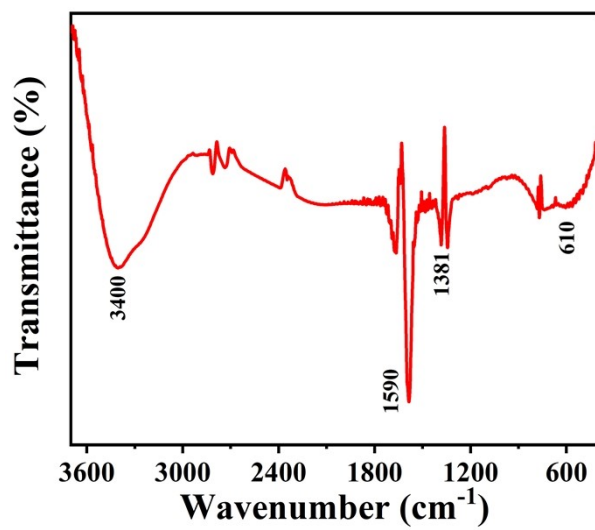

Fig. S3. FTIR spectrum of Ni/Co LDHs.

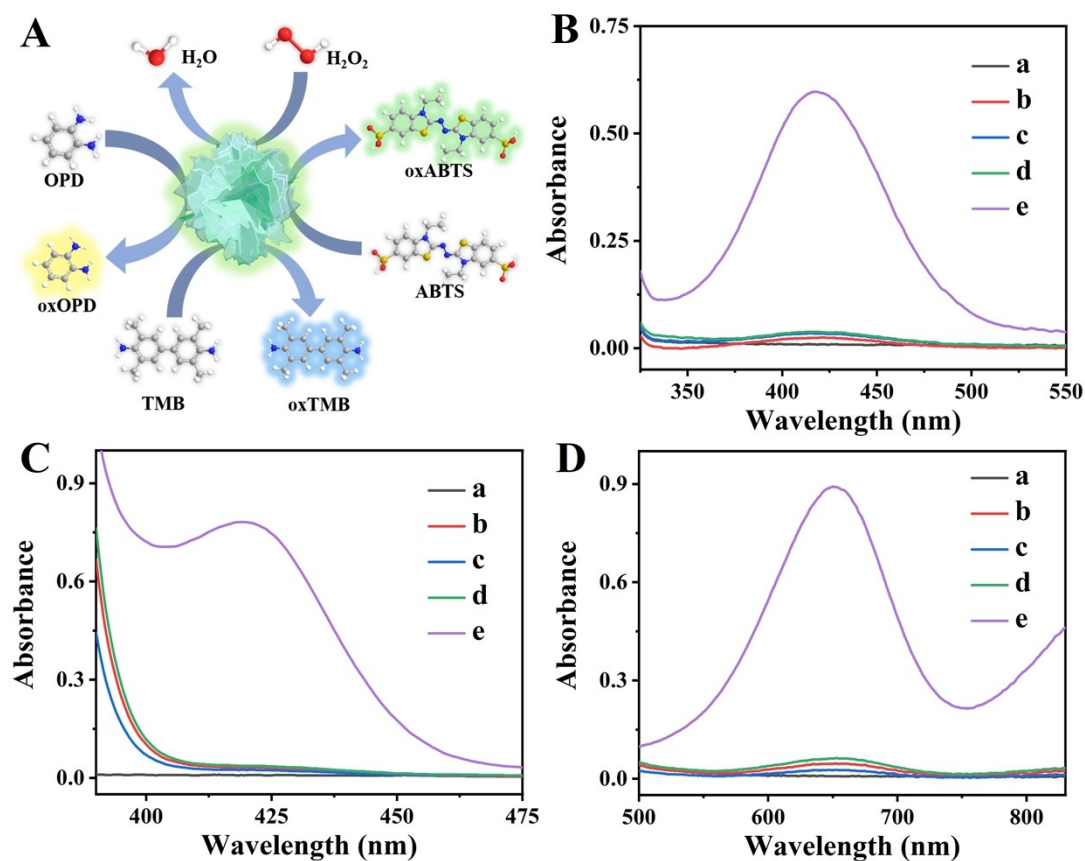

**Fig. S4.** Study on the peroxidase-like catalytic ability of Ni/Co LDHs. (A) The schematic illustration of the peroxidase-like activity; (B) the UV-vis absorption spectra of (a) Ni/Co LDHs only, (b) OPD only, (c) LDHs and OPD solution under  $N_2$  atmosphere, (d) LDHs and OPD solution under  $O_2$  atmosphere, (e) LDHs, OPD, and  $H_2O_2$  solution under  $N_2$  atmosphere; (C) the UV-vis absorption spectra of (a) Ni/Co LDHs only, (b) ABTS only, (c) LDHs and ABTS solution under  $N_2$  atmosphere, (d) LDHs and ABTS solution under  $O_2$  atmosphere, (e) LDHs, ABTS, and  $H_2O_2$  solution under  $N_2$  atmosphere; (D) the UV-vis absorption spectra of (a) Ni/Co LDHs only, (b) TMB only, (c) LDHs and TMB solution under  $N_2$  atmosphere, (d) LDHs and TMB solution under  $O_2$  atmosphere, (e) LDHs, TMB, and  $H_2O_2$  solution under  $N_2$  atmosphere.

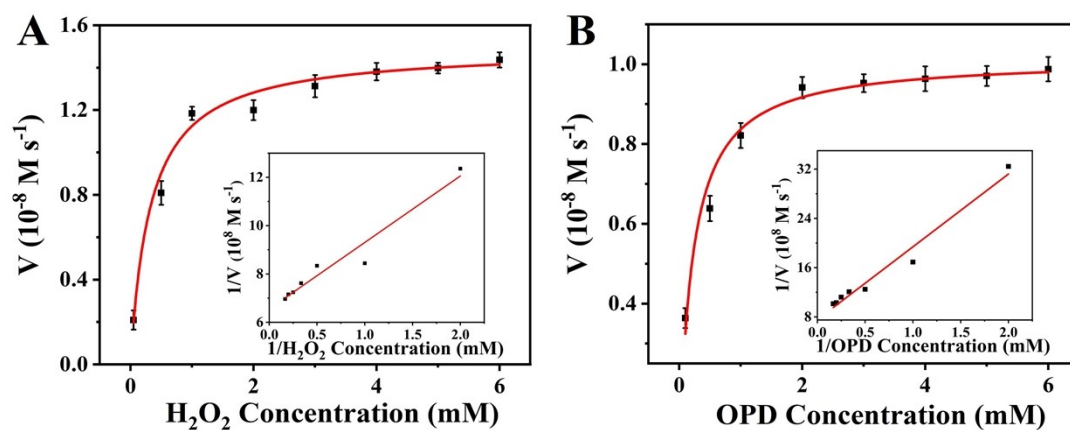

**Fig. S5.** The steady-state kinetics analysis. (A, B) Michaelis–Menten curves from activity data of (A) the fixed concentration of OPD (5 mM) and various concentrations of  $\text{H}_2\text{O}_2$  (0.05–6 mM); (B) the fixed concentration of  $\text{H}_2\text{O}_2$  (5 mM) and various concentrations of OPD (0.1–6 mM); The inset shows the corresponding double-reciprocal plots for the calculation of enzyme kinetic parameters by the Michaelis–Menten equation. The error bars represent the standard deviation of three measurements.

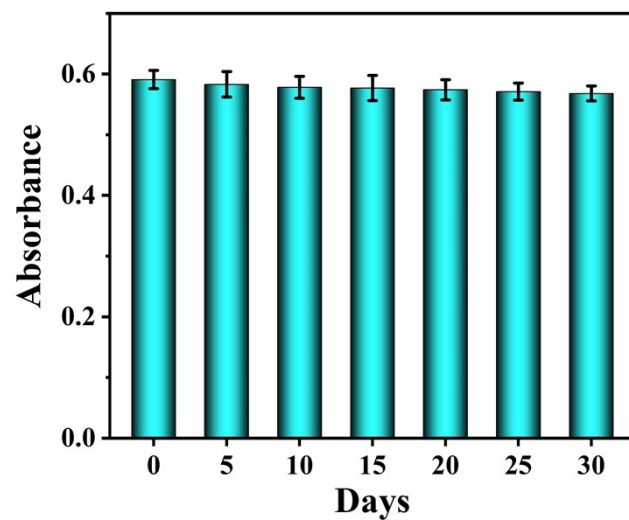

**Fig. S6.** Absorbance of the OPD solution at 420 nm after catalyzed by the Ni/Co LDHs stored at -4 °C for different days: 0, 5, 10, 15, 20, 25, and 30 days, respectively.

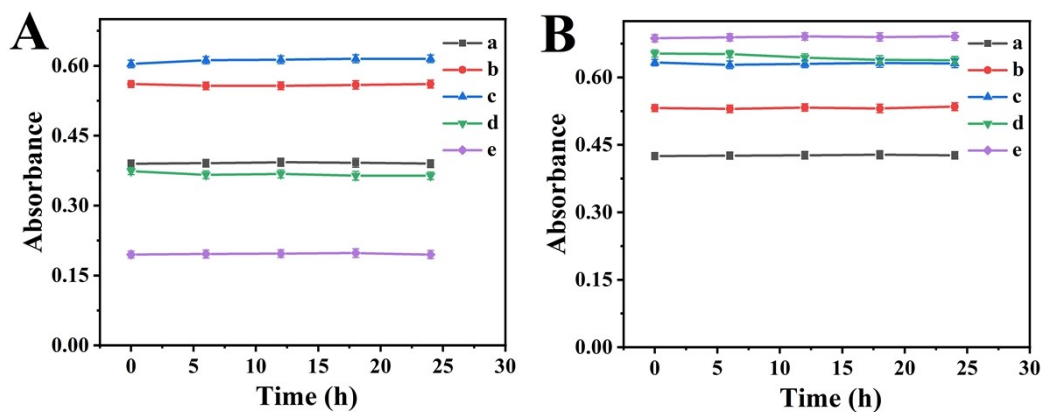

**Fig. S7.** Absorbance of the OPD solution at 420 nm after catalyzed by the Ni/Co LDHs stored in (A) different pH buffer for different hours: (a) 7, (b) 8, (c) 9, (d) 10, and (e) 11; (B) different temperature for different hours: (a) 20, (b) 25, (c) 30, (d) 35, and (e) 40 °C.

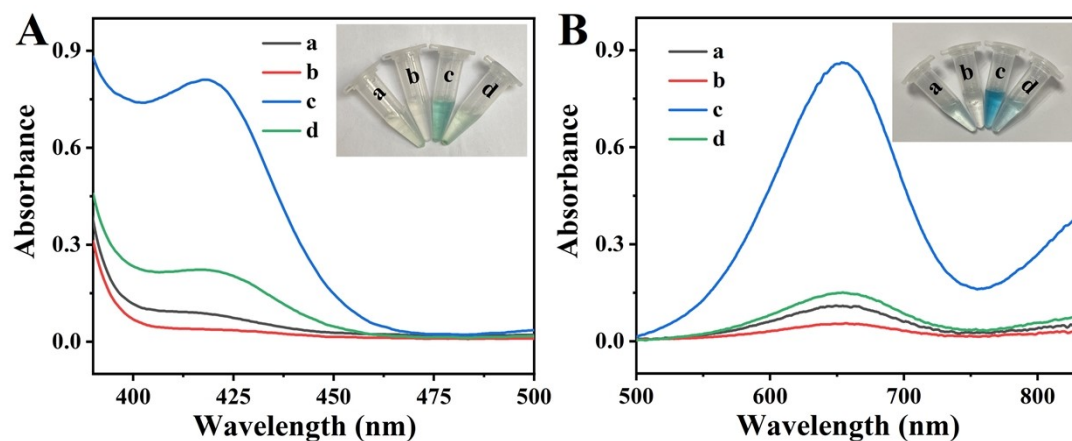

**Fig. S8.** Absorbance of the sensing system under different conditions in the presence of: (A) (a) LDHs and ABTS, (b)  $\text{H}_2\text{O}_2$  and ABTS, (c) LDHs,  $\text{H}_2\text{O}_2$  and ABTS, (d) LDHs,  $\text{H}_2\text{O}_2$ , ABTS, and AChE, respectively; (B) (a) LDHs and TMB, (b)  $\text{H}_2\text{O}_2$  and TMB, (c) LDHs,  $\text{H}_2\text{O}_2$  and TMB, (d) LDHs,  $\text{H}_2\text{O}_2$ , TMB, and AChE, respectively.



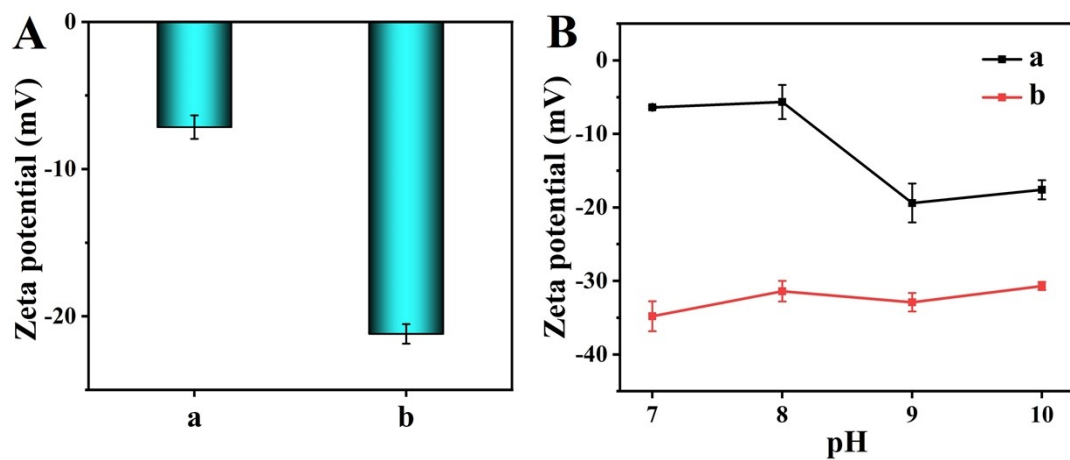

**Fig. S9.** (A) Zeta potential value of LDHs (a) and LDHs/AChE (b); (B) zeta potential of LDHs (a) and LDHs/AChE (b) under different pH.

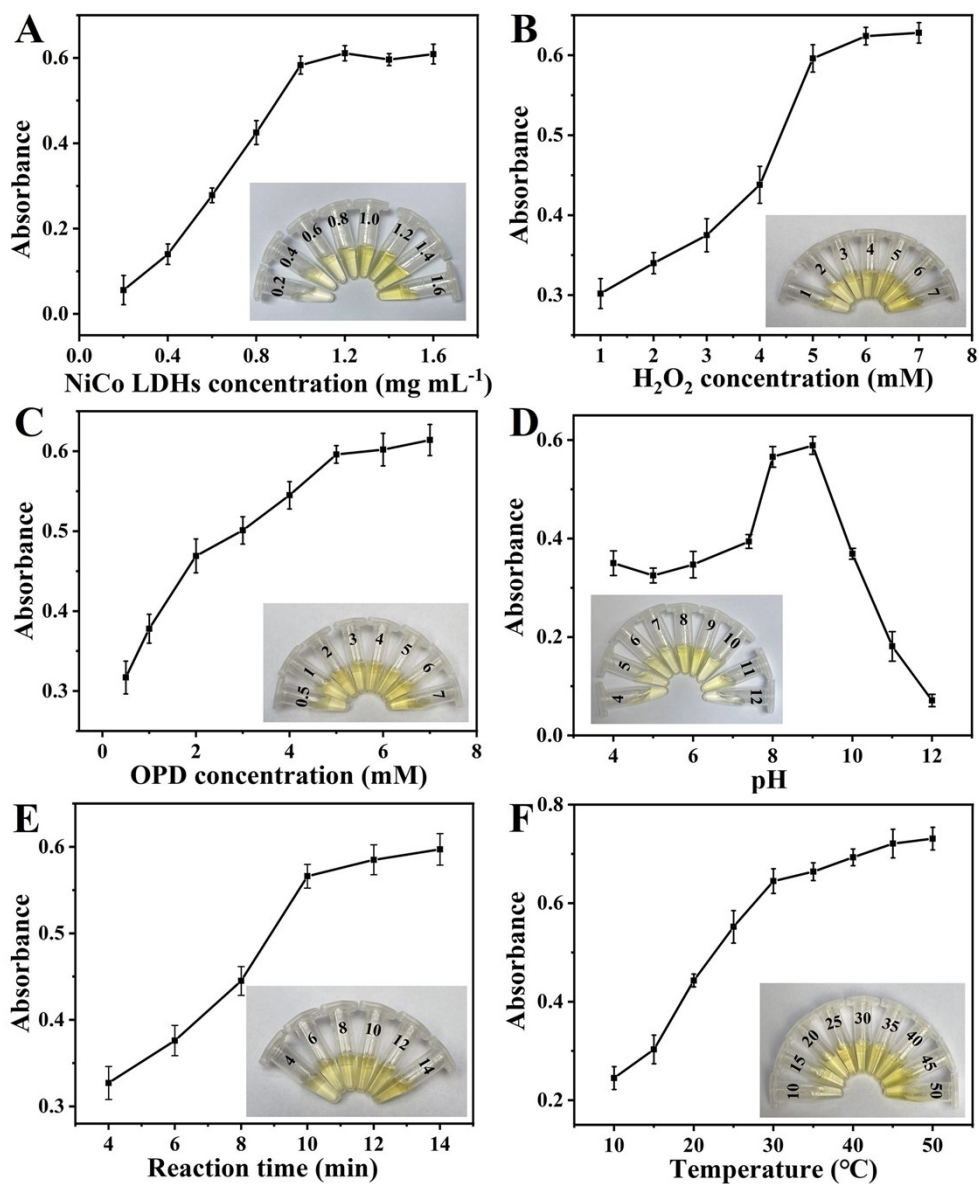

**Fig. S10.** Absorbance variation obtained under different conditions: (A) Ni/Co LDHs concentrations: 0.2, 0.4, 0.8, 1.0, 1.2, 1.4, and 1.6 mg mL<sup>-1</sup>; (B) H<sub>2</sub>O<sub>2</sub> concentrations: 1, 2, 3, 4, 5, 6, and 7 mM; (C) OPD concentrations: 0.2, 0.4, 0.8, 1.0, 1.2, 1.4, and 1.6 mg mL<sup>-1</sup>; (D) pH: 4, 5, 6, 7.4, 8, 9, 10, 11, and 12; (E) reaction time: 4, 6, 8, 10, 12, and 14 min; (F) temperature: 10, 15, 20, 25, 30, 35, 40, 45, and 50 °C.

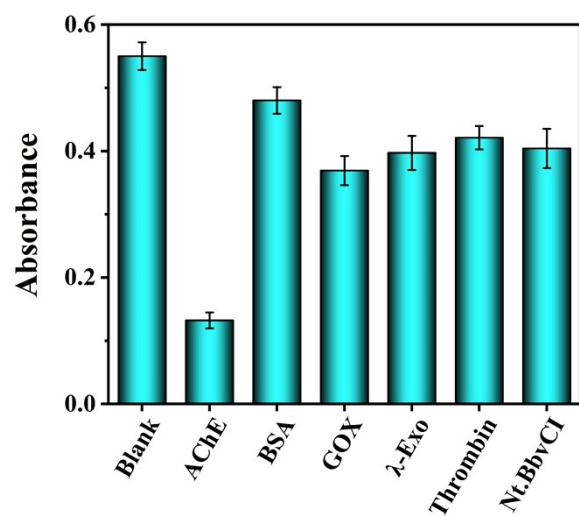

**Fig. S11.** The influence of catalytical performance in the absence (blank) and presence of different protein: AChE, BSA, GOX, λ-Exo, thrombin, Nt.BbvCI with the same concentration.

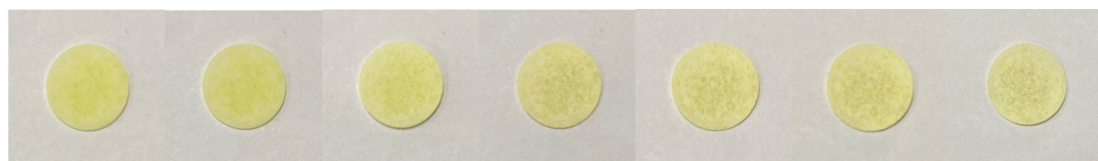

**1<sup>st</sup> day   2<sup>nd</sup> day   3<sup>rd</sup> day   4<sup>th</sup> day   5<sup>th</sup> day   6<sup>th</sup> day   7<sup>th</sup> day**

**Fig. S12.** The color response of the paper-based biosensor after storing at room temperature for seven days.

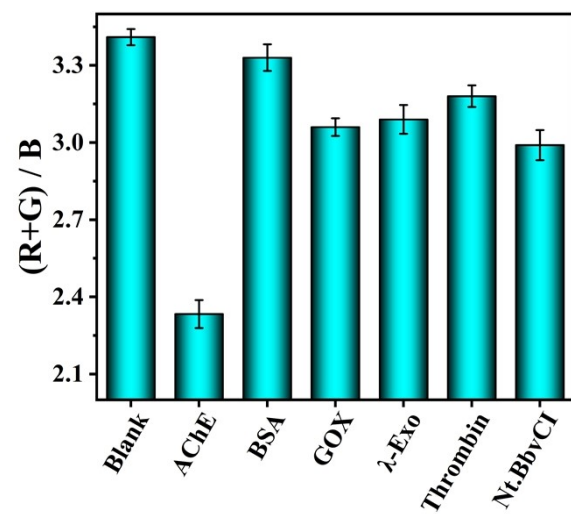

**Fig. S13.** The (R+G)/B value in the absence (blank) and presence of different protein: AChE, BSA, GOX,  $\lambda$ -Exo, thrombin, Nt.BbvCI with the same concentration.

## References

- S1. X. Liu, Q. Wang, H. H. Zhao, L. C. Zhang, Y. Y. Su, Y. Lv, BSA-templated MnO<sub>2</sub> nanoparticles as both peroxidase and oxidase mimics, *Analyst*, 2012, **137**, 4552–4558.
- S2. M. Gharib, A. Kornowski, H. Noei, W. J. Parak, I. Chakraborty, Protein-protected porous bimetallic AgPt nanoparticles with pH-switchable peroxidase/catalase-mimicking activity, *ACS Materials Lett.*, 2019, **1**, 310–319.
- S3. J. Kong, J. Zheng, Z. M. Li, J. B. Huang, F. H. Cao, Q. Zeng, F. Li, One-pot synthesis of AuAgPd trimetallic nanoparticles with peroxidase-like activity for colorimetric assays, *Anal. Bioanal. Chem.*, 202, **1413**, 5383–5393.
- S4. G. Begum, P. Swathi, A. K. Bandarapu, J. Nayak, R. K. Rana, Spatial confinement of enzyme and nanozyme in silica-based hollow microreactors, *ACS Appl. Mater. Interfaces*, 2020, **12**, 45476–45484.
- S5. D. Z. Yang, Q. L. Li, S. K. Tammina, Z. Gao, Y. L. Yang, Cu-CDs/H<sub>2</sub>O<sub>2</sub> system with peroxidase-like activities at neutral pH for the cocatalytic oxidation of O-phenylenediamine and inhibition of catalytic activity by Cr(III), *Sens. Actuators B Chem.*, 2020, **319**, 128273.
- S6. W. Q. Meng, Z. P. Pei, Y. R. Wang, M. X. Sun, Q. Q. Xu, J. F. Cen, K. Guo, K. Xiao, Z. J. Li, Two birds with one stone: The detection of nerve agents and AChE activity with an ICT-ESIPT-based fluorescence sensor, *J. Hazard. Mater.*, 2021, **410**, 124811.
- S7. R. L. Zhang, S. S. Liang, M. Jin, T. He, Z. Q. Zhang, Simple and sensitive fluorescence assay for acetylcholinesterase activity detection and inhibitor screening based on glutathione-capped gold nanoclusters, *Sens. Actuators B Chem.*, 2017, **253**, 196–202.

S8. M. S. Ye, B. X. Lin, Y. Yu, H. Li, Y. M. Wang, L. Zhang, Y. J. Cao, M. L. Guo, A ratiometric fluorescence probe based on graphene quantum dots and o-phenylenediamine for highly sensitive detection of acetylcholinesterase activity, *Microchim. Acta*, 2020, **187**, 511.

S9. J. J. Zhang, W. S. Zheng, X. Y. Jiang, Ag<sup>+</sup>-gated surface chemistry of gold nanoparticles and colorimetric detection of acetylcholinesterase, *Small*, 2018, **14**, 1801680.

S10. D. D. Zhang, Q. Y. Han, W. D. Liu, K. Y. Xu, M. Z. Shao, Y. Y. Li, P. Y. Du, Z. Zhang, B. S. Liu, L. B. Zhang, X. Q. Lu, Au-decorated N-rich carbon dots as peroxidase mimics for the detection of acetylcholinesterase activity, *ACS Appl. Nano Mater.*, 2022, **5**, 1958–1965.

S11. T. Han, G. F. Wang, Peroxidase-like activity of acetylcholine-based colorimetric detection of acetylcholinesterase activity and an organophosphorus inhibitor, *J. Mater. Chem. B*, 2019, **7**, 2613–2618.

S12. R. Jin, Z. H. Xing, D. S. Kong, X. Yan, F. M. Liu, Y. Gao, P. Sun, X. S. Liang, G. Y. Lu, Sensitive colorimetric sensor for point-of-care detection of acetylcholinesterase using cobalt oxyhydroxide nanoflakes, *J. Mater. Chem. B*, 2019, **7**, 1230–1237.

S13. B. Y. Li, Y. X. Guo, Y. F. Jiang, J. M. Lin, Q. Z. Hu, L. Yu, A pendant proplet-based sensor for the detection of acetylcholinesterase and its inhibitors, *Chem. Commun.*, 2021, **57**, 8909–8912.

S14. T. Hou, L. F. Zhang, X. Z. Sun, F. Li, Biphasic photoelectrochemical sensing strategy based on in situ formation of CdS quantum dots for highly sensitive detection of acetylcholinesterase activity and inhibition, *Biosens. Bioelectron.*, 2016, **75**, 359–364.

S15. Y. Chen, W. F. Zhao, J. C. Si, Y. N. Zheng, H. Tan, F. N. Meng, G. H. Yang, Y. Q. Gu, L. L. Qu, Highly selective SERS detection of acetylcholinesterase in human blood based on catalytic reaction, *Anal. Chim. Acta*, 2022, **1232**, 340495.
